# Supplementary material
Source: PubMed Central journal article supplement (PMC2772155)



*Advanced*  
**Synthesis &  
Catalysis**

Supporting Information

© Copyright Wiley-VCH Verlag GmbH & Co. KGaA, 69451 Weinheim, 2009

## **-Supporting Information for-**

### **Comparison of the relative reactivities of the triisopropylsilyl group with two fluororous analogs**

Amador Garcia Sancho, Xiao Wang, Bin Sui and Dennis P. Curran

Department of Chemistry, University of Pittsburgh, Pittsburgh PA, 15208

Email: [curran@pitt.edu](mailto:curran@pitt.edu)

#### **Table of Contents**

|                                                                                                                             |   |
|-----------------------------------------------------------------------------------------------------------------------------|---|
| <sup>1</sup> H NMR spectrum of C <sub>8</sub> F <sub>17</sub> (CH <sub>2</sub> ) <sub>3</sub> Si(ipr <sub>2</sub> )H .....  | 2 |
| <sup>13</sup> C NMR spectrum of C <sub>8</sub> F <sub>17</sub> (CH <sub>2</sub> ) <sub>3</sub> Si(ipr <sub>2</sub> )H ..... | 3 |
| <sup>19</sup> F NMR spectrum of C <sub>8</sub> F <sub>17</sub> (CH <sub>2</sub> ) <sub>3</sub> Si(ipr <sub>2</sub> )H.....  | 4 |



AGS-2FTIPS, CDCl3 301 Amador 11/14/2007

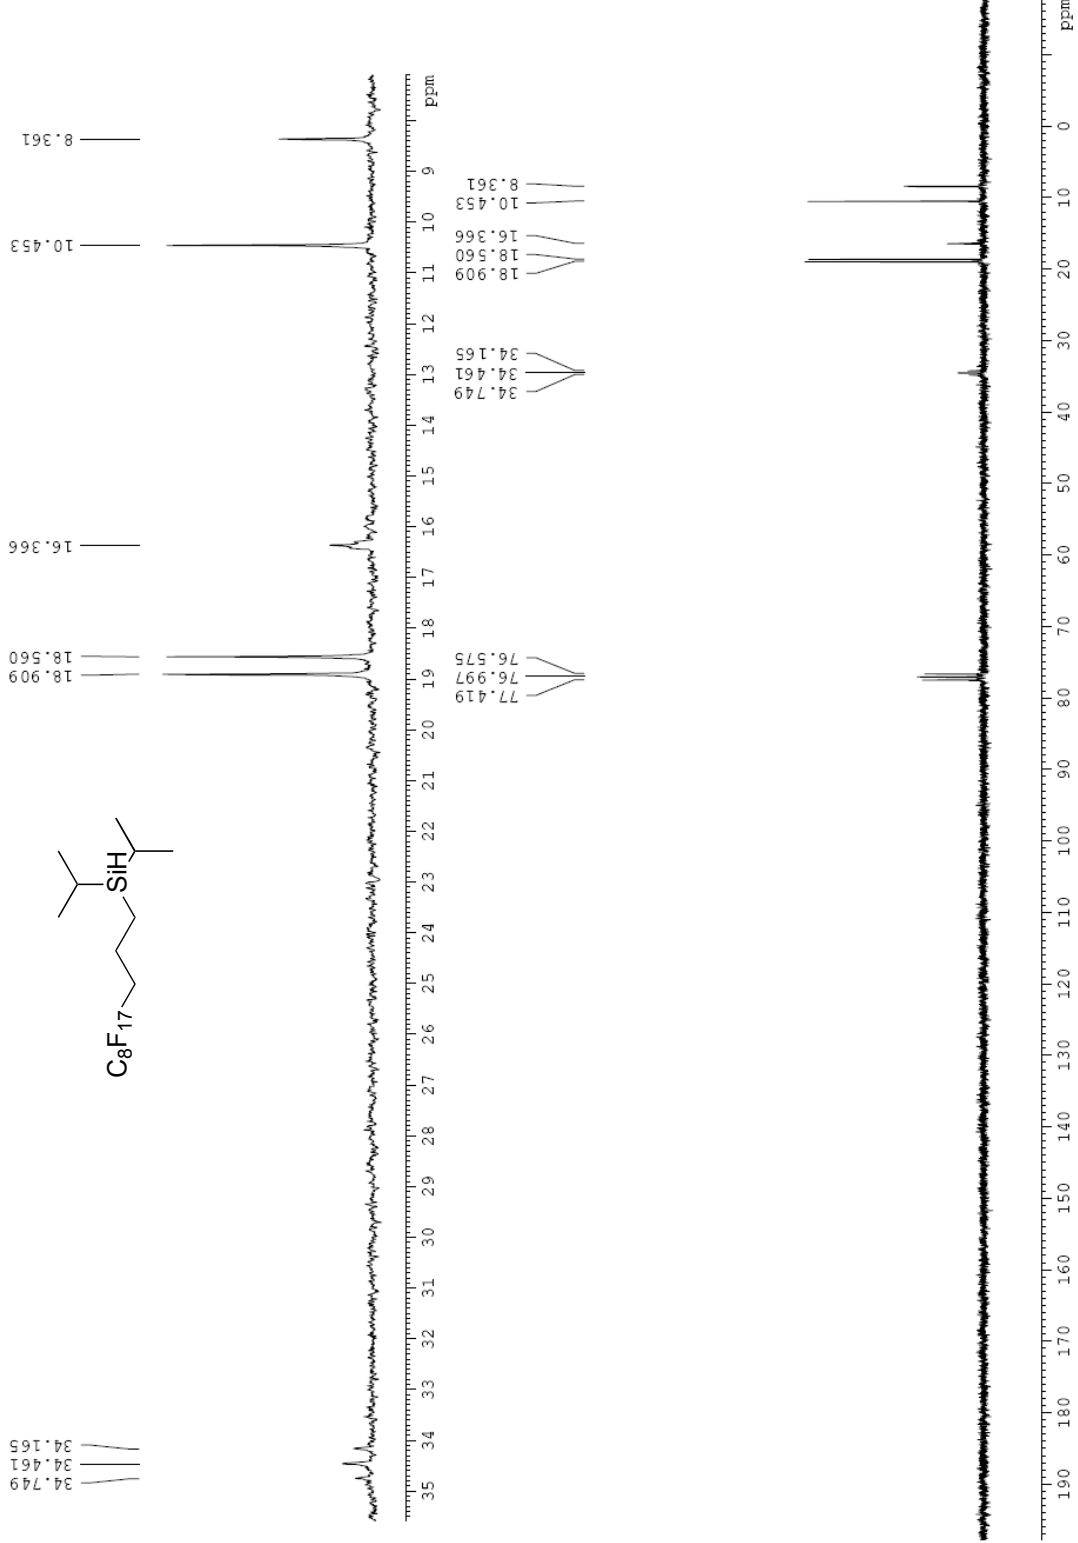

AGS-2FTIPS, CDCl3 301 Amador 11/14/2007

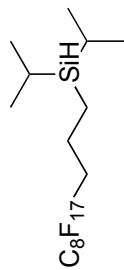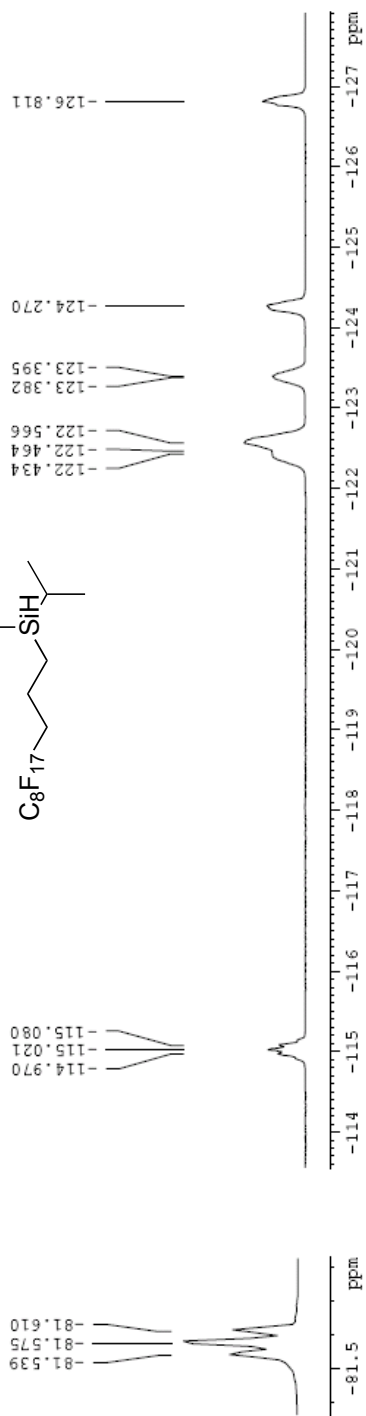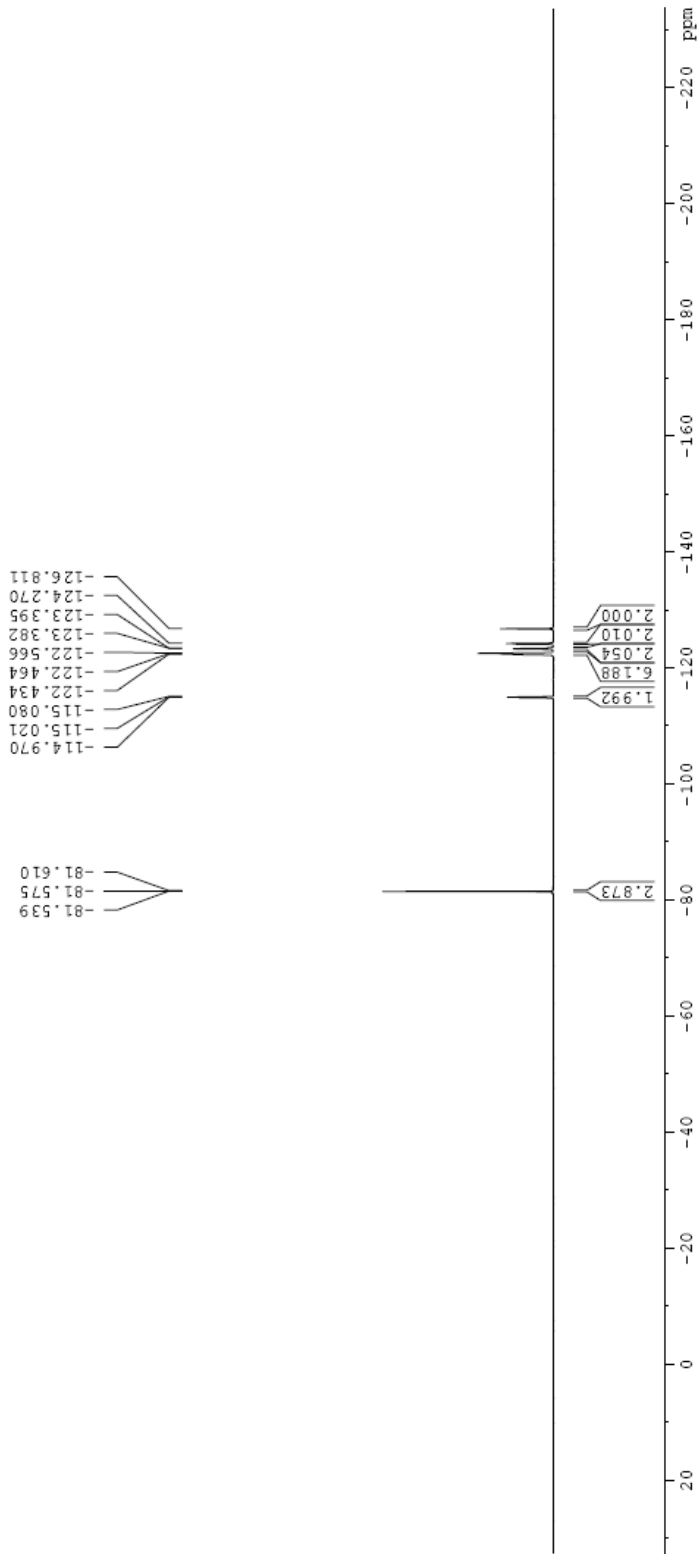

Supplement: NIHMS140857-supplement-1.pdf [file NIHMS140857-supplement-1.pdf]
